# Supplementary material for: Oxidatively induced exposure of active surface area during microwave assisted formation of Pt3Co nanoparticles for oxygen reduction reaction
Source: Royal Society of Chemistry journal article supplement (doi:10.1039/c9ra02095k), 2019-01-01
Supplement: c9ra02095k1.pdf [file c9ra02095k1.pdf]

## Supplementary Information

# Oxidatively Induced Exposure of Active Surface Area during Microwave Assisted Formation of Pt<sub>3</sub>Co Nanoparticles for Oxygen Reduction Reaction

Robin Sandström<sup>a</sup>, Joakim Ekspong<sup>a</sup>, Eduardo Gracia-Espino<sup>a</sup>, Thomas Wågberg<sup>\*,a</sup>

<sup>a</sup>Department of Physics, Umeå University, Umeå 90187, Sweden

\*Corresponding author: E-mail address: [thomas.wagberg@umu.se](mailto:thomas.wagberg@umu.se)

The current ( $i$ ) is related to the kinetic current ( $i_k$ ) and diffusion limited current ( $i_L$ ) by the equation (Koutecky – Levich)

$$\frac{1}{i} = \frac{1}{i_k} + \frac{1}{i_L} = \frac{1}{i_k} + \frac{1}{0.62nFACD^{2/3}\nu^{-1/6}\omega^{1/2}}, \quad (\text{S1})$$

where  $F$  is Faraday constant;  $C$  is the O<sub>2</sub> concentration in saturated 0.1 M HClO<sub>4</sub> ( $1.26 \times 10^{-6} \text{ mol cm}^{-3}$ );  $\nu$  is the electrolytes kinematic viscosity ( $0.00893 \text{ cm}^2 \text{ s}^{-1}$ );  $\omega$  is the angular rotational frequency;  $D$  is the O<sub>2</sub> diffusion coefficient in the electrolyte ( $1.93 \times 10^{-5} \text{ cm}^2 \text{ s}^{-1}$ );  $A$  is the surface area and  $n$  is the electron transfer number.  $j_k$  was used to calculate both specific and mass activities. The mass activities were then acquired by  $j_k$  normalized by the determined total Pt-mass on the electrode (Loading from TGA result while assuming 3:1 Pt:Co atomic ratio) and, after electrochemical active surface area had been obtained through CO-stripping, specific activities was obtained by  $j_k$  normalized by the measured electrochemical platinum surface area on the electrode.

H<sub>2</sub>/O<sub>2</sub> PEM fuel cell tests were performed on Pt/C and Pt<sub>3</sub>Co/C. The electrodes were prepared by spraying an ink formulated with 4 mg ml<sup>-1</sup> catalyst powder in 90 % 2-propanol in (H<sub>2</sub>O)<sub>DI</sub> and 33 wt.% Nafion® (DE 520, Ion Power) by 30 min sonication. The spraycoating was performed with a Badger® Krome Renegade airbrush connected to an N<sub>2</sub> pressure of 3 bar by carefully spraying in a serpentine motion on the substrate (Sigracet GDL 24 BC). The electrodes were set to dry overnight on a hotplate at 60 °C. Membrane electrode assemblies (MEAs), were produced by sandwiching two electrodes (each with metal loading of about 0.2 mg cm<sup>-2</sup>) with a Nafion® NR211 membrane by hotpressing at 120 kg cm<sup>-2</sup> for 3 min at 130 °C with a hot-pressing

apparatus (Stahls Hotronix® 6"x6" heat press). All membranes were pre-treated before use at 80 °C in (H<sub>2</sub>O)<sub>DI</sub>, 3 % H<sub>2</sub>O<sub>2</sub>, (H<sub>2</sub>O)<sub>DI</sub>, 0.5 M H<sub>2</sub>SO<sub>4</sub> and finally (H<sub>2</sub>O)<sub>DI</sub> respectively and stored in (H<sub>2</sub>O)<sub>DI</sub> until use.

MEAs were loaded into 5 cm<sup>2</sup> cell fixture (Baltic FuelCells GmbH) connected to a Scribner 850e fuel cell test station operating at 60 °C. O<sub>2</sub> and H<sub>2</sub> were both humidified to 95% RH (and supplied at a rate of 100 ml min<sup>-1</sup>). Conditioning took place by keeping the potential constant at 0.55 V until reaching stable performance. Note: Pt/C required appr. 12 h while Pt<sub>3</sub>Co/C required a total of appr. 50 h conditioning before stable performance could be reached. Polarization curves were then recorded with increments of 200 mA and 5 min stabilization per data point.

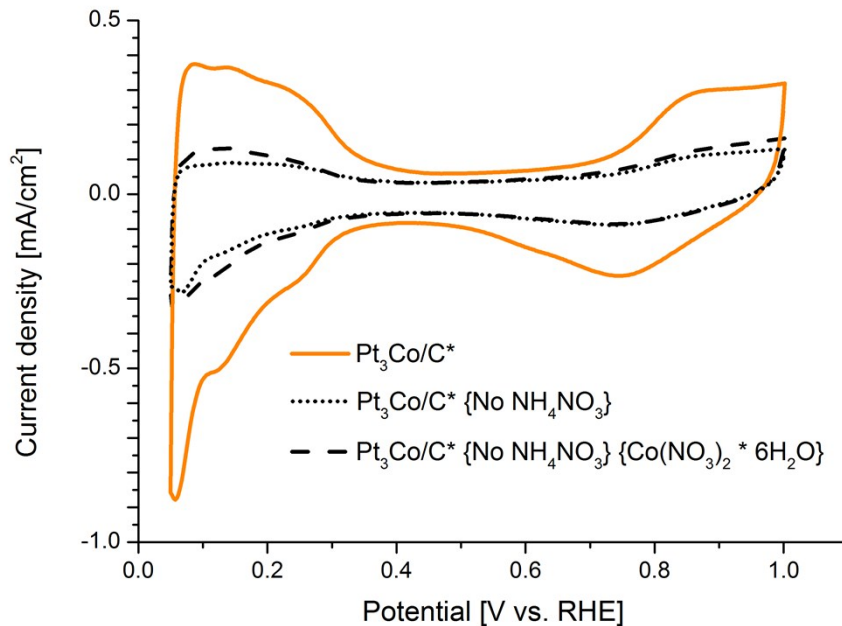

**Fig. S1.** ECSA measurements by  $H_{UPD}$  in Ar saturated 0.1 M HClO<sub>4</sub> comparing Pt<sub>3</sub>Co/C\* with and without added NH<sub>4</sub>NO<sub>3</sub> during synthesis. The significant difference in ECSA demonstrates the necessity of an oxidative source while forming NPs with organic precursors in this fashion. As a proof of concept, the dashed line in addition show a sample where the Co-acetate was replaced with Co(NO<sub>3</sub>)<sub>2</sub> \* 6H<sub>2</sub>O also with omitted NH<sub>4</sub>NO<sub>3</sub> showing that the nitrate decomposition of this Co precursor was not enough to overcome the ECSA of Pt<sub>3</sub>Co/C\*. Note: both reference samples here had to be stopped after ca. 2 min due to excessive heat build-up.

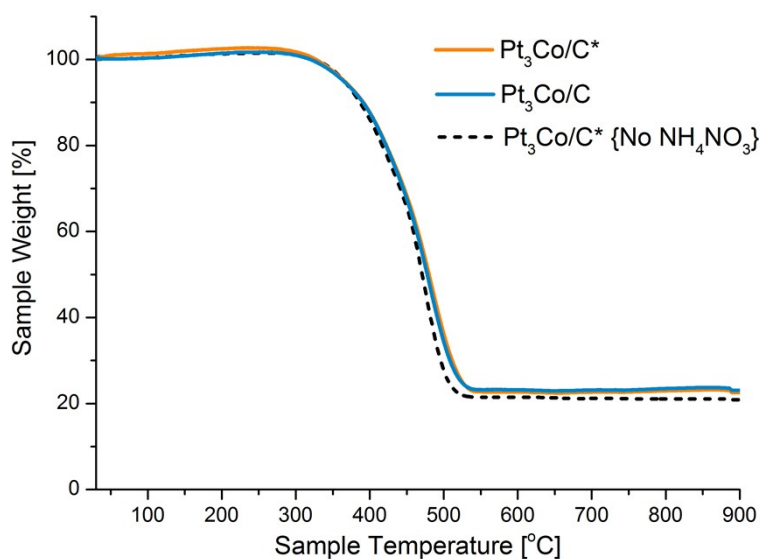

**Fig. S2.** Thermogravimetric measurements of the synthesized  $Pt_3Co/C^*$  (22.5 wt.%) and  $Pt_3Co/C$  (23.0 wt.%) samples as well as  $Pt_3Co/C^*$  where the addition of ammonium nitrate was omitted in the synthesis (21.0 wt.%).

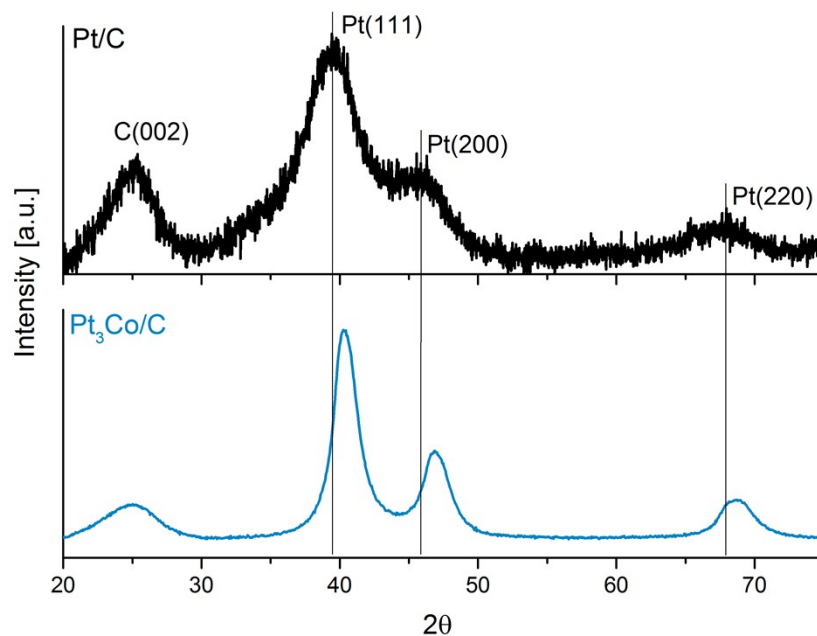

**Fig. S3.** X-ray diffraction pattern of  $Pt/C$  compared to  $Pt_3Co/C$ . The upshift on Pt fcc reflections support Co incorporation.

**Table S1.** Measured kinetic currents (in mA) recorded from LSV curves before and after the accelerated degradation procedure.

|                           | Pt/C   | Pt <sub>3</sub> Co/C* | Pt <sub>3</sub> Co/C |
|---------------------------|--------|-----------------------|----------------------|
| Initial $i_k$ [mA]        | 0.8498 | 1.0444                | 1.4711               |
| $i_k$ post 6k cycles [mA] | 0.6978 | 0.8477                | 1.1474               |

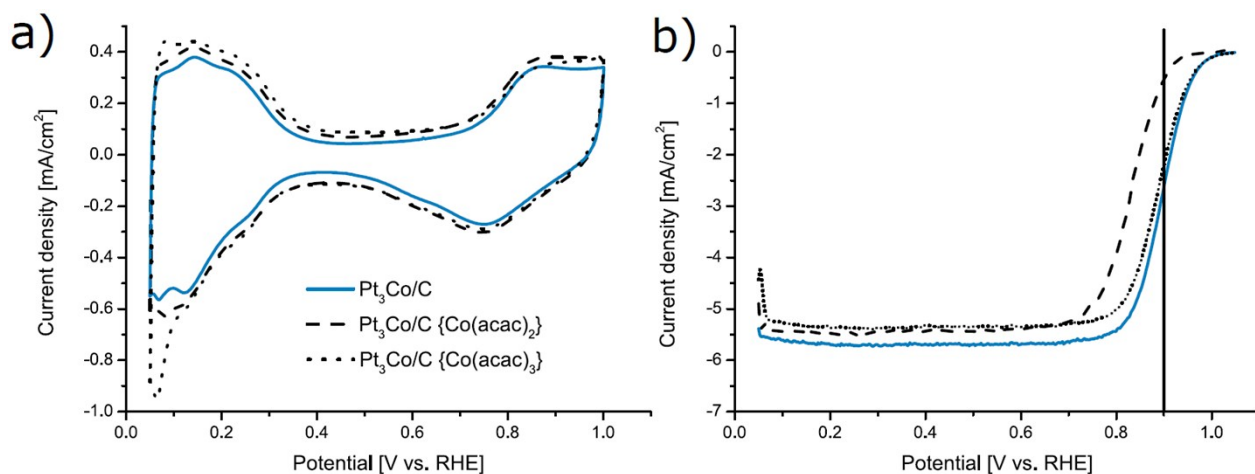

**Fig. S4.** LSV characteristics (a) and  $H_{UPD}$  curve (b) of Pt<sub>3</sub>Co/C as compared to the same synthesis procedure, but with Co(II) and Co(III) metal acetylacetonates. Despite also having satisfactory revealed ECSA, these organic precursors resulted in worse activity than for Pt<sub>3</sub>Co/C, thus strengthening the confidence in that the correct Co precursor was selected in our study. Note: The selections of Co precursors were limited since similar reaction conditions to Pt<sub>3</sub>Co/C\* could not be reached, presumably due to a modification of their dielectric properties, making viable comparisons problematic. Both commercially available Co acetylacetonate salts however were visibly similar and a full 5 min initial reaction could be achieved.

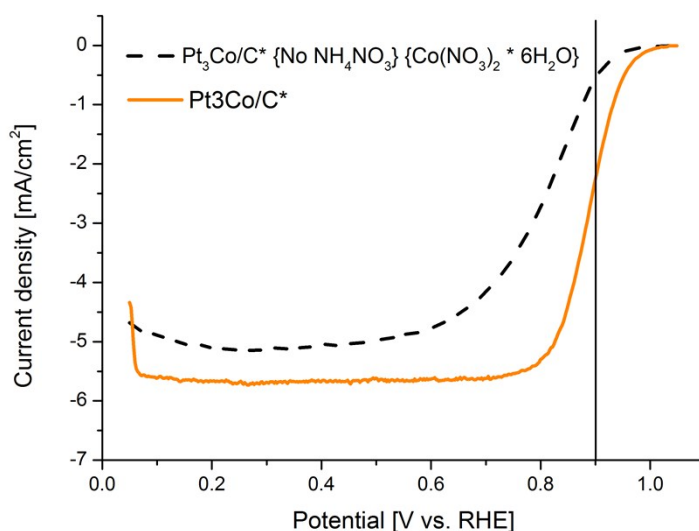

**Fig. S5.** LSV curve of Pt<sub>3</sub>Co/C\* compared to Pt<sub>3</sub>Co/C\* produced with a Co-nitrate precursor and omitted NH<sub>4</sub>NO<sub>3</sub> with a 2 min synthesis, very similar to our previous study with successful synthesis of Pt<sub>3</sub>Y/C shown in ref.<sup>1</sup>. Our results show that this approach is not feasible for Pt<sub>3</sub>Co. ECSA cv-curve of this catalyst can be found in fig. S1.

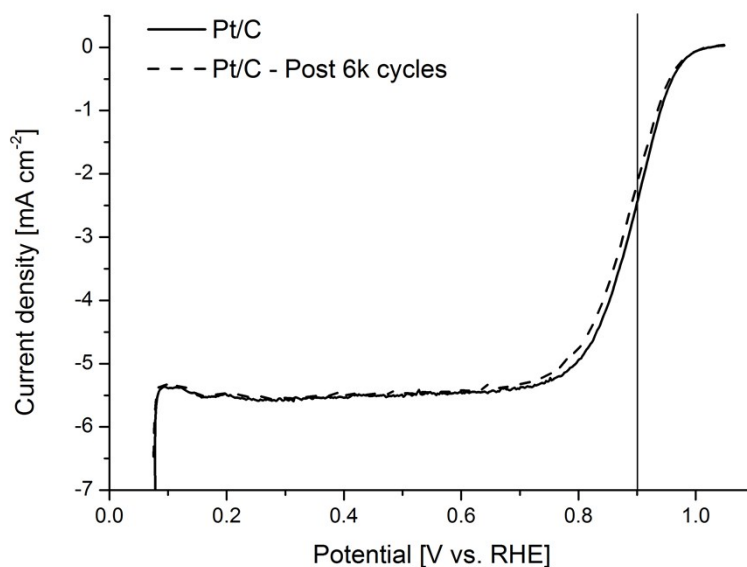

**Fig. S6.** LSV characteristics of Pt/C with the LSV profile post 6000 cycles between 0.6 and 1.0 V vs. RHE in O<sub>2</sub> saturated HClO<sub>4</sub>. The accelerated degradation test resulted in an 18 % loss of j<sub>k</sub>.

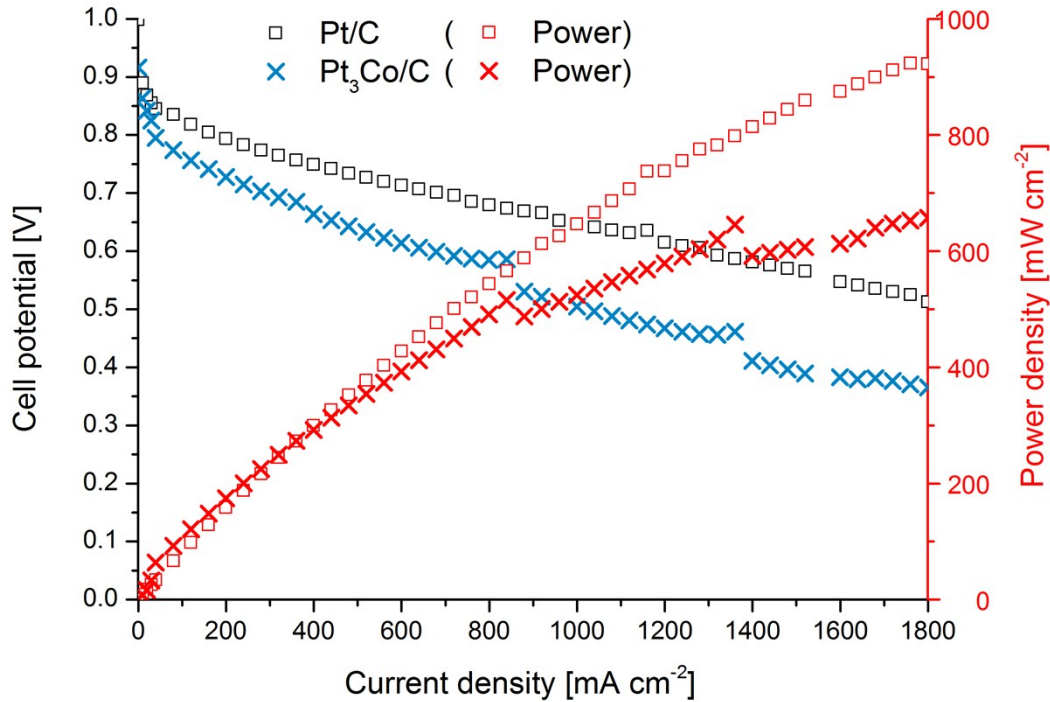

**Fig. S7.**  $H_2/O_2$  PEM fuel cell performance evaluation of Pt/C and  $Pt_3Co/C$ . Polarization curves were recorded after conditioning at 0.55 V until reaching stable performance. Tests performed with lower nafion content (~20 %) with  $Pt_3Co/C$  resulted in delamination of the catalyst layer from the membrane and are therefore not comparable.

## References

- (1) Sandström, R.; Gracia-Espino, E.; Hu, G.; Shchukarev, A.; Ma, J.; Wågberg, T. Ytria Stabilized and Surface Activated Platinum (Pt<sub>xyoy</sub>) Nanoparticles through Rapid Microwave Assisted Synthesis for Oxygen Reduction Reaction. *Nano Energy* **2018**, *46*, 141-149.
